# Supplementary material
Source: Royal Society of Chemistry journal article supplement (doi:10.1039/d6cc02237e)
Supplement: d6cc02237e1.pdf [file d6cc02237e1.pdf]

## Supplementary Information

### Design of a flexible aromatic gate to immobilize C<sub>60</sub> in a ferritin cage

Taiga Suzuki <sup>[a]</sup>, Yuki Hishikawa <sup>[a]</sup>, Basudev Maity <sup>[a]</sup>, Yumie Nishiyama <sup>[b]</sup>, Kazunori Motai <sup>[b]</sup>, Yuhei Hayamizu <sup>[b]</sup>, Satoshi Abe <sup>[c]</sup>, Takafumi Ueno<sup>\*[a,d]</sup>

[a] T. Suzuki, Dr. Y. Hishikawa, Dr. B. Maity, Prof. T. Ueno  
School of Life Science and Technology, Institute of Science Tokyo  
Nagatsuta-cho 4259, Midori-ku, Yokohama 226-8501, Japan  
E-mail: [tueno@bio.titech.ac.jp](mailto:tueno@bio.titech.ac.jp)

[b] Y. Nishiyama, Dr. K. Motai, Prof. Y. Hayamizu  
School of Material Science and Technology, Institute of Science Tokyo  
2-12-1, Ookayama, Meguro-ku, Tokyo 152-8550, Japan

[c] Dr. S. Abe  
School of Life and Environmental Sciences, Kyoto Prefectural University  
1-5 Hangi-cho, Shimogamo, Sakyo-ku, Kyoto 606-8522, Japan

[d] Prof. T. Ueno  
Research Center for Autonomous Systems Materialogy (ASMat), Institute of Integrated  
Research, Institute of Science Tokyo  
Nagatsuta-cho 4259, Midori-ku, Yokohama 226-8501, Japan

\* Correspondence to: [tueno@bio.titech.ac.jp](mailto:tueno@bio.titech.ac.jp)

# Table of Contents

|                                                                                                                                                               | Page |
|---------------------------------------------------------------------------------------------------------------------------------------------------------------|------|
| <b>1. Methods</b>                                                                                                                                             |      |
| 1.1 Materials and preparation of apo-Fr mutants                                                                                                               | 4    |
| 1.2 C <sub>60</sub> complexation reactions                                                                                                                    | 4    |
| 1.3 Estimation of C <sub>60</sub> content in C <sub>60</sub> ·Fr-F3G3                                                                                         | 4    |
| 1.4 Crystallization of Fr                                                                                                                                     | 5    |
| 1.5 X-ray crystal structure analysis and refinement                                                                                                           | 5    |
| 1.6 Molecular dynamics (MD) simulation                                                                                                                        | 6    |
| 1.7 Energy decomposition analysis                                                                                                                             | 6    |
| <b>2. Supplementary Figures</b>                                                                                                                               |      |
| <b>Fig. S1.</b> MALDI-TOF-MS and Native PAGE of apo-Fr mutants.                                                                                               | 7    |
| <b>Fig. S2.</b> UV–vis spectral comparisons among <b>apo-Fr-X3G3</b> and <b>C<sub>60</sub>·Fr-X3G3</b> .                                                      | 8    |
| <b>Fig. S3.</b> Calibration curve in BCA assay.                                                                                                               | 9    |
| <b>Fig. S4.</b> Molecular structure and complexation results of C <sub>70</sub> and buckyferrocene.                                                           | 9    |
| <b>Fig. S5.</b> Optical images of Fr crystals used for X-ray structure analysis.                                                                              | 10   |
| <b>Fig. S6.</b> 2F <sub>o</sub> -F <sub>c</sub> map of C <sub>60</sub> in the crystal structure of <b>C<sub>60</sub>·Fr-F3G3</b> .                            | 10   |
| <b>Fig. S7.</b> Difference Fourier map F <sub>o</sub> ( <b>C<sub>60</sub>·Fr-F3G3</b> ) - F <sub>o</sub> ( <b>apo-Fr-F3G3</b> ).                              | 11   |
| <b>Fig. S8.</b> Surrounding environment of C <sub>60</sub> in the crystal structure of <b>C<sub>60</sub>·Fr-F3G3</b> .                                        | 11   |
| <b>Fig. S9.</b> UV–vis spectra for analysis of the surrounding environment of C <sub>60</sub> in <b>C<sub>60</sub>·Fr-F3G3</b> .                              | 12   |
| <b>Fig. S10.</b> Representative snapshots in MD simulation of <b>C<sub>60</sub>·Fr-F3G3</b> and <b>apo-Fr-F3G3</b> .                                          | 13   |
| <b>Fig. S11.</b> Energy decomposition analysis of <b>C<sub>60</sub>·Fr-F3G3</b> .                                                                             | 13   |
| <b>Fig. S12.</b> Crystal structures of <b>apo-Fr-A3G3</b> .                                                                                                   | 14   |
| <b>Fig. S13.</b> Initial structure of <b>apo-Fr-F3G3 + C<sub>60</sub></b> and <b>apo-Fr-A3G3 + C<sub>60</sub></b> for MD simulation.                          | 14   |
| <b>Fig. S14.</b> Positions of C <sub>60</sub> after 100 ns of MD simulations of <b>apo-Fr-F3G3 + C<sub>60</sub></b> and <b>apo-Fr-A3G3 + C<sub>60</sub></b> . | 15   |
| <b>Fig. S15.</b> Crystal structures of <b>apo-Fr-Y3G3</b> .                                                                                                   | 16   |
| <b>Fig. S16.</b> Distributions of $\chi_1$ dihedral angles of aromatic residues during MD simulations of <b>apo-Fr-X3G3</b> (X = F, Y, W).                    | 17   |
| <b>Fig. S17.</b> Crystal structures of <b>apo-Fr-W3G3</b> .                                                                                                   | 18   |

### **3. Supplementary Tables**

|                                                                                                                             |    |
|-----------------------------------------------------------------------------------------------------------------------------|----|
| <b>Table S1.</b> Summary of X-ray data and refinement statistics                                                            | 19 |
| <b>Table S2.</b> Distances between C <sub>60</sub> and carbon atoms of residues constituting the hydrophobic cavity.        | 20 |
| <b>Table S3.</b> List of the peaks in the UV–vis spectra of C <sub>60</sub> in various solvents.                            | 20 |
| <b>Table S4.</b> Contributions of each residue to the van der Waals interaction energy between C <sub>60</sub> and Fr-F3G3. | 21 |

### **4. Description of supplementary Movies** 22

### **5. Supplementary References** 23

# 1. Methods

## 1.1 Materials and preparation of apo-Fr mutants

All reagents were purchased from TCI, Wako, Nacalai Tesque, and Sigma–Aldrich and used as received. To prepare the recombinant horse spleen L-chain ferritin (Fr) mutants, an *E. coli* expression system was used. Plasmids of the Fr mutants with pMK2 expression vector were prepared using KOD-Plus-Mutagenesis kit (Toyobo). The prepared plasmid was transformed into NovaBlue competent cells (Novagen). *E. coli* with the mutant plasmids were cultured in LB medium containing 50 µg/ml ampicillin at 37°C for 18-24 hours, harvested by centrifugation, and disrupted by sonication. The lysate was heat-treated at 70°C for 15 minutes and then subjected to anion-exchange and size-exclusion chromatography. To confirm the purity and molecular weight of the Fr mutants, Native PAGE and MALDI-TOF-MS were conducted. The molecular mass of Fr mutants was determined by MALDI-TOF-MS (Bruker, ultrafleXtreme). Native-PAGE was performed in a 4.5% stacking gel and a 7.5% separation gel at 100 V for 90 minutes. The concentration of purified Fr was calculated from the Abs<sub>280</sub> by UV–vis measurement (UV-2600, SHIMADZU). The extinction coefficient was calculated using the Expasy program tool.

## 1.2 C<sub>60</sub> complexation reactions

The complex **C<sub>60</sub>·Fr-X3G3** was synthesized by mixing **apo-Fr-X3G3** in a buffer solution (50 mM Tris-HCl, pH 8, 0.15 M NaCl), C<sub>60</sub> powder, 50% methanol, and 5% PEG400 for dissolving C<sub>60</sub>, followed by sonication for 1 hour and heat treatment at 70°C for 24 hours. After the reaction, the mixture was subjected to dialysis using a 6–8 kDa MWCO membrane against the buffer (50 mM Tris-HCl, 0.15 M NaCl, pH 8) to remove organic solvents and PEG400. The dialyzed solution was filtered through 0.45 or 0.2 µm membrane to remove insoluble C<sub>60</sub> aggregates. The filtrate was concentrated by ultrafiltration using an Amicon centrifugal filter unit (50 kDa MWCO). The resulting solution was analyzed by UV–vis absorption spectroscopy to confirm C<sub>60</sub> complexation.

## 1.3 Estimation of C<sub>60</sub> content in C<sub>60</sub>·Fr-F3G3

The C<sub>60</sub> content in **C<sub>60</sub>·Fr-F3G3** was calculated from the concentrations of C<sub>60</sub> and **Fr-F3G3**. The concentration of Fr was determined from the Abs<sub>595</sub> using BCA assay. A calibration curve was constructed using **apo-Fr-F3G3** with known concentrations based on Abs<sub>280</sub>. The concentration of C<sub>60</sub> was calculated from the Abs<sub>332</sub>. The absorption coefficient of C<sub>60</sub> “ $\epsilon_{332} = 4.27 \times 10^4 \text{ dm}^3 \text{ mol}^{-1} \text{ cm}^{-1}$ ” was used based on a previous report.<sup>1</sup> Although the absorption spectrum of C<sub>60</sub> changes depending on the solvent and surrounding environment, the absorption spectrum of C<sub>60</sub> in **Fr-F3G3** matches well with that in  $\gamma$ -cyclodextrin; for that reason, the absorption coefficient was adopted.

## 1.4 Crystallization of Fr

The Fr solution was concentrated for the hanging-drop crystallization. An equal volume (2  $\mu$ L) of Fr solution (40  $\mu$ M Fr, 50 mM Tris-HCl, pH 8, 150 mM NaCl) was mixed with precipitant solution (0.5–1 M  $(\text{NH}_4)_2\text{SO}_4$ , 10–20 mM  $\text{CdSO}_4$  aqueous solution), and equilibrated against the precipitant solution at 20  $^\circ\text{C}$ .

## 1.5 X-ray crystal structure analysis and refinement

The X-ray diffraction data of the Fr crystals were collected using the single crystal X-ray diffractometer (XtaLaB Synergy-DW, Rigaku) at Suzukakedai Materials Analysis Division, Institute of Science Tokyo. Before data collection, crystals were soaked into the cryoprotectant solution (0.5 M  $(\text{NH}_4)_2\text{SO}_4$ , 20 mM  $\text{CdSO}_4$ , 25% (w/w) ethylene glycol) and subsequently frozen in liquid nitrogen. The X-ray diffraction data were collected at -180  $^\circ\text{C}$  using an X-ray wavelength of 1.54  $\text{Å}$ . The data were processed using CrysAlisPro in the cubic  $F432$  space group. The crystal structures were analyzed at 1.50 ~ 1.99  $\text{Å}$  resolution. For the  $\text{C}_{60}$  molecular model, 60C.cif registered in Ligand Expo was used after modification of restraint so that the  $\text{C}_{60}$  structure does not collapse during refinement. The structure was modelled in coot and refined in refmac until a reasonable model was built. All the structures were finally validated by wwPDB validation server.

## 1.6 Molecular dynamics (MD) simulation

The initial structures for simulations of **C<sub>60</sub>·Fr-F3G3** and **apo-Fr-X3G3** (X = F, Y, W) were constructed from the crystal structures by removing crystallized water molecules, cadmium ions, and ethylene glycol. The initial structure for the simulation of **C<sub>60</sub>·Fr-A3G3** was constructed by removing aromatic rings of 56F, 60F, and 63F from the initial structure of **C<sub>60</sub>·Fr-F3G3**. The initial structure for the simulation of **apo-Fr-F3G3** with C<sub>60</sub> placed in the cage but outside the cavity (**apo-Fr-F3G3 + C<sub>60</sub>**) was prepared using the crystal structure of **apo-Fr-F3G3** and a C<sub>60</sub> molecule placed 4.5 Å from the two 56F at each dimer unit. **Apo-Fr-A3G3** with C<sub>60</sub> placed in the cage but outside the cavity (**apo-Fr-A3G3 + C<sub>60</sub>**) was prepared by replacing **apo-Fr-F3G3** part with **apo-Fr-A3G3** based on its crystal structure. The 24-mer structures were built from the monomer using crystallographic symmetry. Force fields were applied using the AMBER22 software package: AMBER 14SB<sup>2</sup> for Fr, TIP3P for water, and the General Amber Force Field for C<sub>60</sub>. A Fr 24-mer cage was placed into a 150 Å × 150 Å × 150 Å cubic box under periodic boundary conditions in water. The system was neutralized by adding Na<sup>+</sup> or Cl<sup>-</sup> ions.

The simulation was performed by the following steps: (1) The system was energy minimized using the steepest descent method with harmonic restraints at 10 kcal mol<sup>-1</sup> Å<sup>-2</sup> for the heavy atoms in Fr. (2) The obtained structures were equilibrated for 0.5 ns in the NVT ensemble (at 343 K, the temperature for C<sub>60</sub> complexation) with restraints on the heavy atoms in Fr. (3) The obtained structures were further equilibrated for 0.5 ns in the NPT ensemble (343 K, 1 bar) with restraints on the heavy atoms in Fr. (4) Production runs were performed for 100 ns in the NPT ensemble (343 K, 1 bar).

For all simulations, a cut-off of 1.0 nm was applied to all non-bonded interactions. A time step of 2 fs was used for the simulations, and coordinates were saved every 100 ps. The calculations were performed using the TSUBAME 3.0 or 4.0 supercomputer at the Institute of Science Tokyo. The trajectories were analyzed using the AMBER software package including CPPTRAJ.<sup>3</sup> The structures were visualized using PyMOL (the PyMOL Molecular Graphics System, Version 2.1, Schrödinger, LLC).

## 1.7 Energy decomposition analysis

Energy decomposition analysis was performed using MD trajectories of C<sub>60</sub>·Fr-F3G3. The MD trajectories were divided into 12 datasets using CPPTRAJ. Each dataset consisted of an Fr dimer and a C<sub>60</sub> molecule and contained 500 frames extracted from the 100 ns simulation. The datasets were used for Molecular Mechanics/Generalized Born Surface Area (MM/GBSA) calculations using MMPBSA.py.<sup>4</sup> The binding energy between C<sub>60</sub> and the Fr dimer was decomposed into van der Waals interaction energy, electrostatic interaction energy, polar solvation energy, and non-polar solvation energy. The van der Waals interaction energy was subjected to per-residue decomposition analysis.

## 2. Supplementary figures

**a**

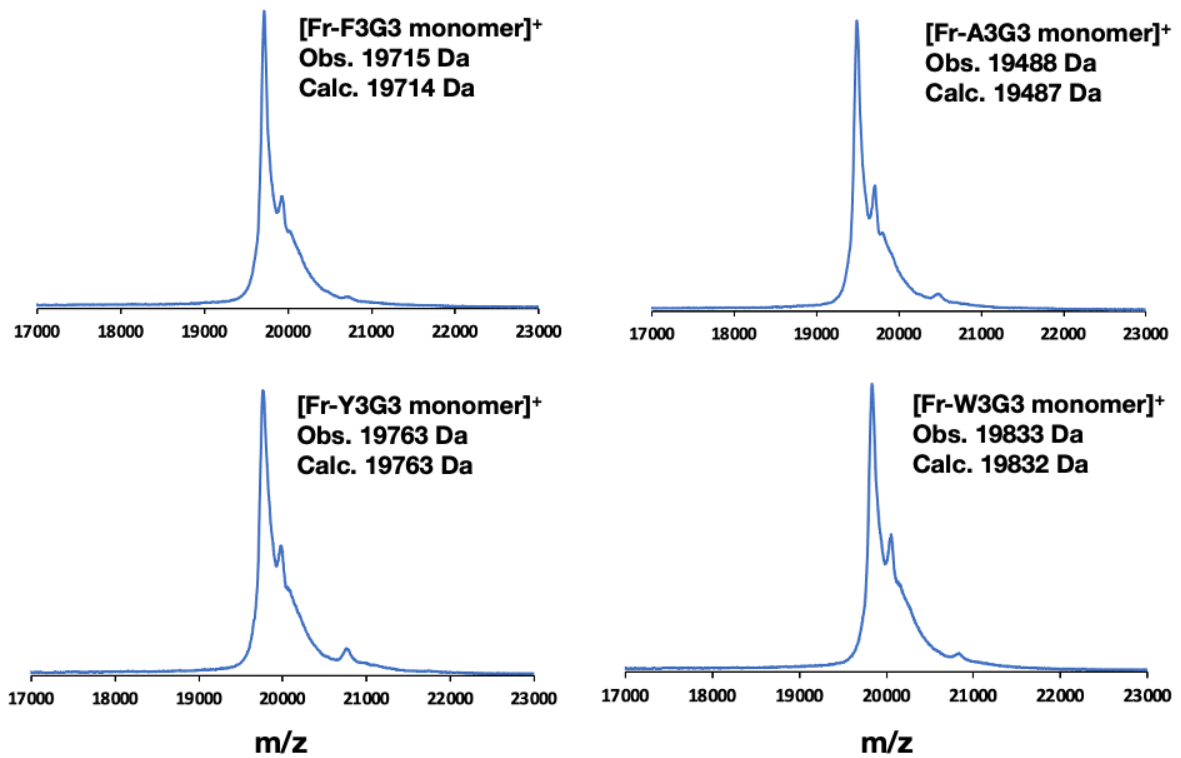

**b**

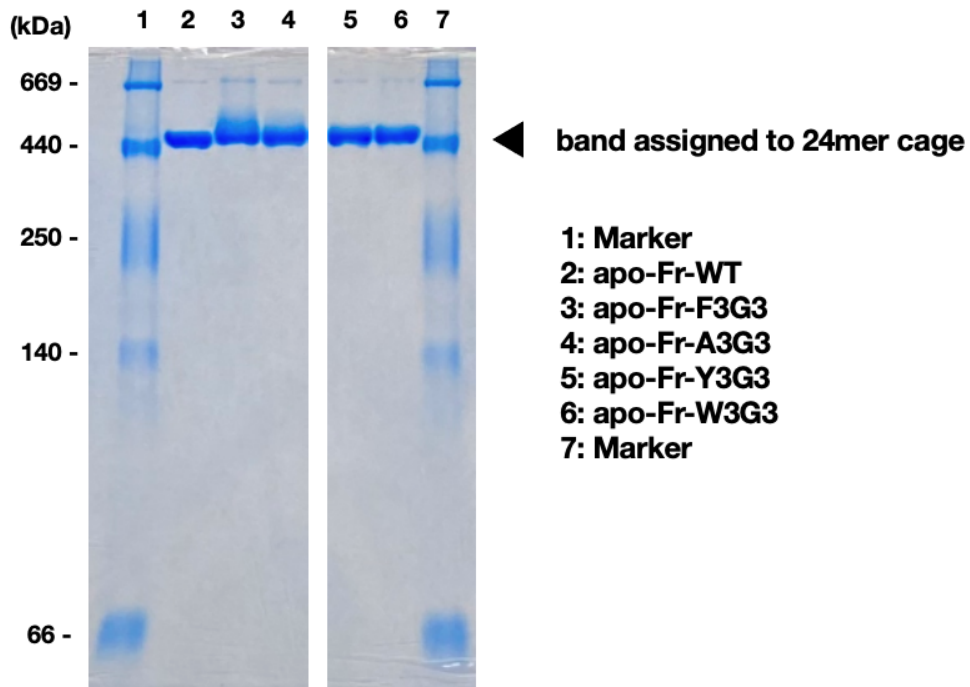

**Fig. S1.** (a) MALDI-TOF-MS spectra of apo-Fr mutants. (b) Native PAGE of apo-Fr mutants, suggesting 24-mer-cage assemblies.

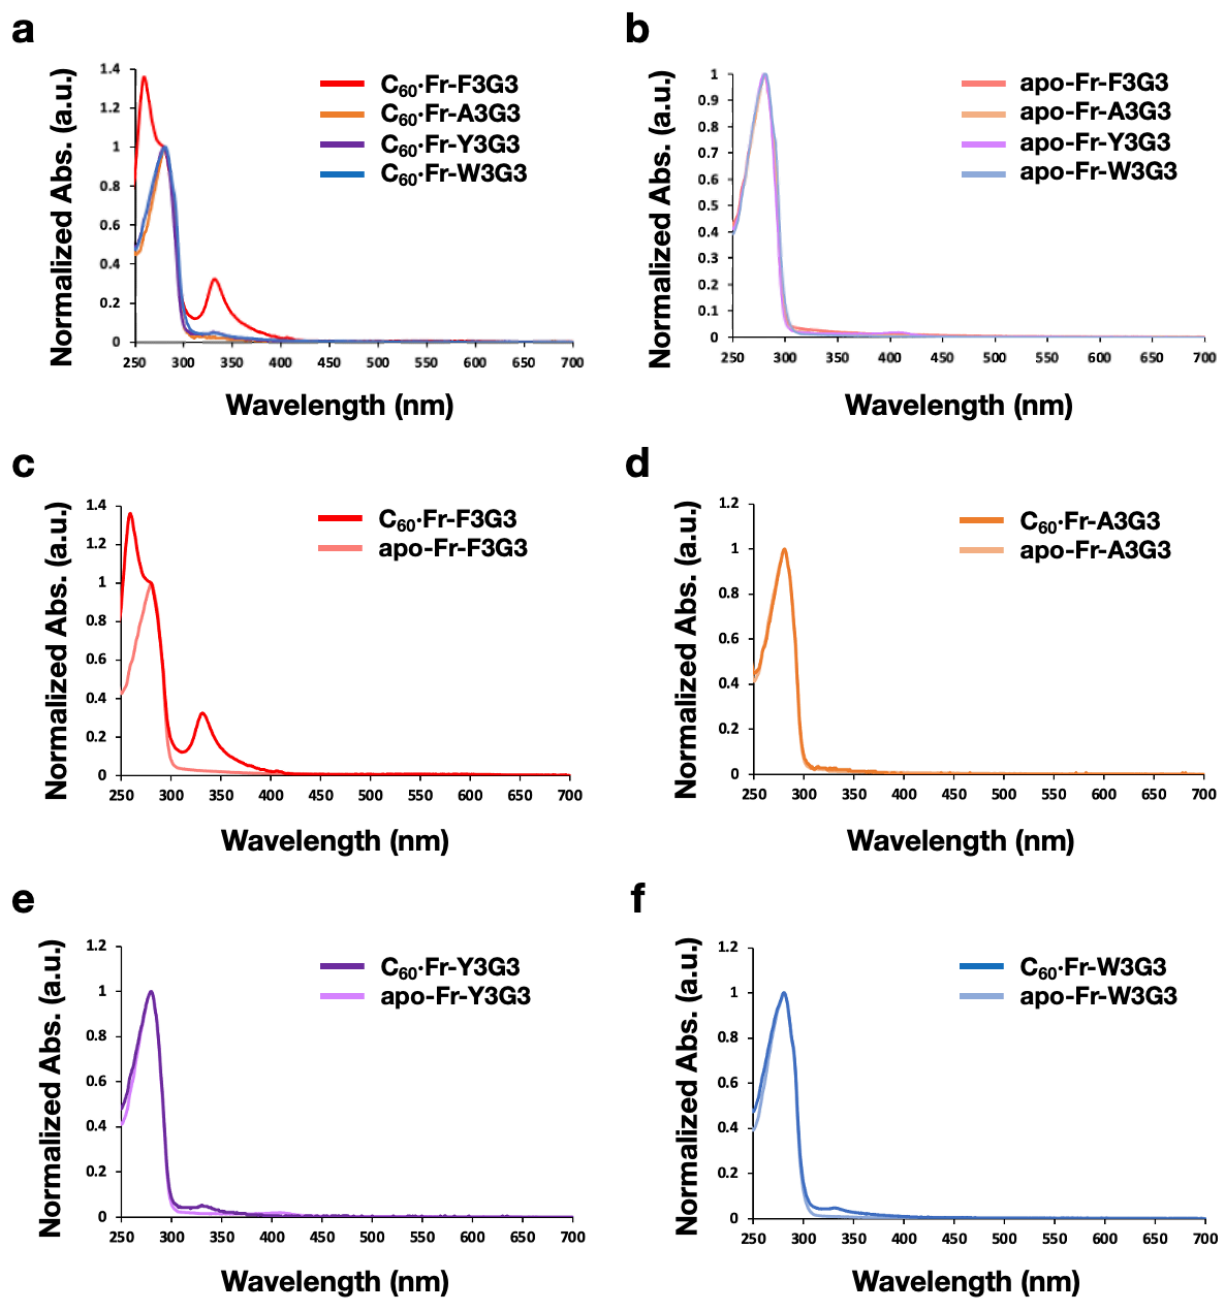

Fig. S2. UV-vis spectral comparisons among/between (a) C<sub>60</sub>-Fr-X<sub>3</sub>G<sub>3</sub> (b) apo-Fr-X<sub>3</sub>G<sub>3</sub> (c) C<sub>60</sub>-Fr-F<sub>3</sub>G<sub>3</sub> and apo-Fr-F<sub>3</sub>G<sub>3</sub> (d) C<sub>60</sub>-Fr-A<sub>3</sub>G<sub>3</sub> and apo-Fr-A<sub>3</sub>G<sub>3</sub> (e) C<sub>60</sub>-Fr-Y<sub>3</sub>G<sub>3</sub> and apo-Fr-Y<sub>3</sub>G<sub>3</sub> (f) C<sub>60</sub>-Fr-W<sub>3</sub>G<sub>3</sub> and apo-Fr-W<sub>3</sub>G<sub>3</sub>. All spectra were normalized by Abs<sub>280</sub>.

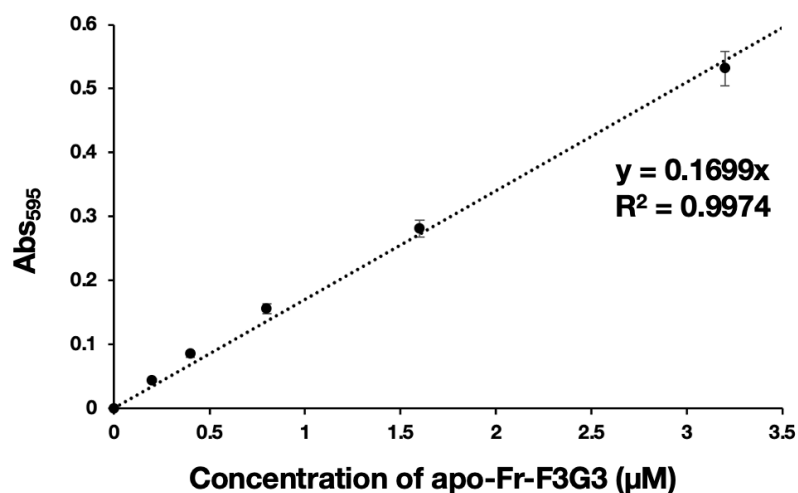

**Fig. S3.** Calibration curve to quantify the concentration of Fr in  $C_{60}$ ·Fr-F3G3 by BCA assay.

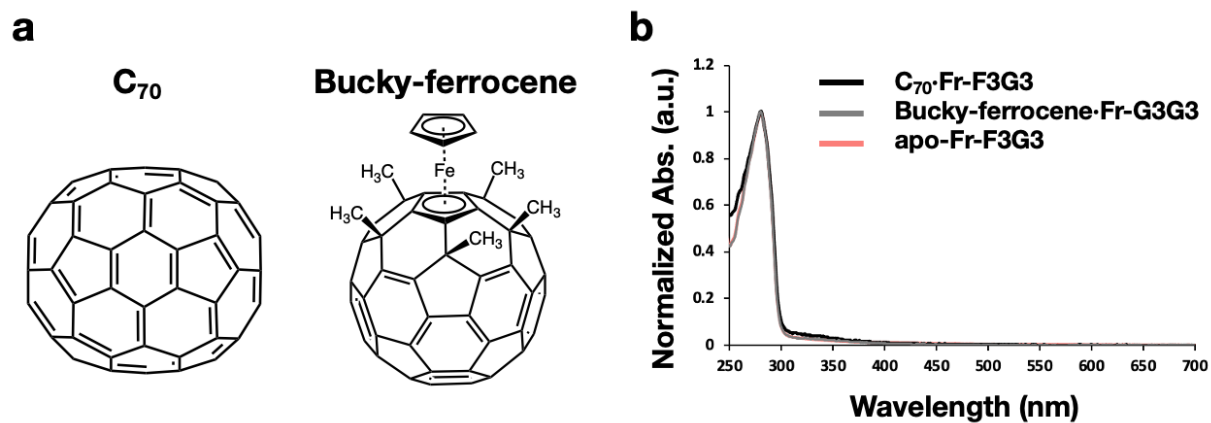

**Fig. S4.** (a) Molecular structure of  $C_{70}$  and buckyferrocene. (b) UV-vis spectra comparisons between before and after complexation of  $C_{70}$  or buckyferrocene. All spectra were normalized by Abs<sub>280</sub>.

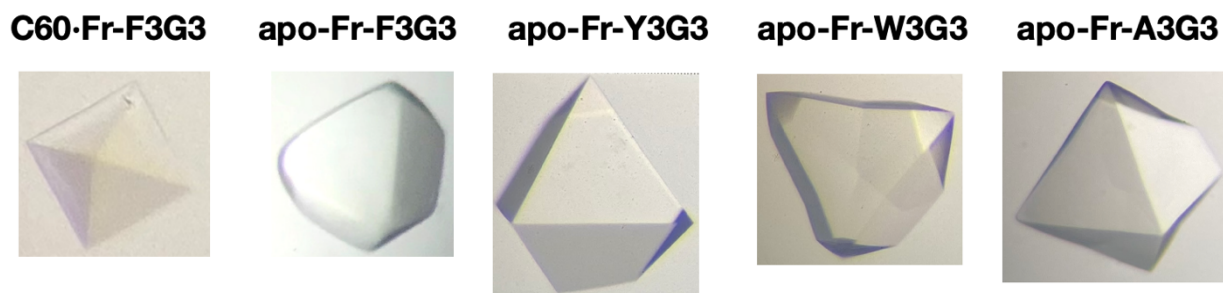

Fig. S5. Optical images of Fr crystals used for X-ray structure analysis.

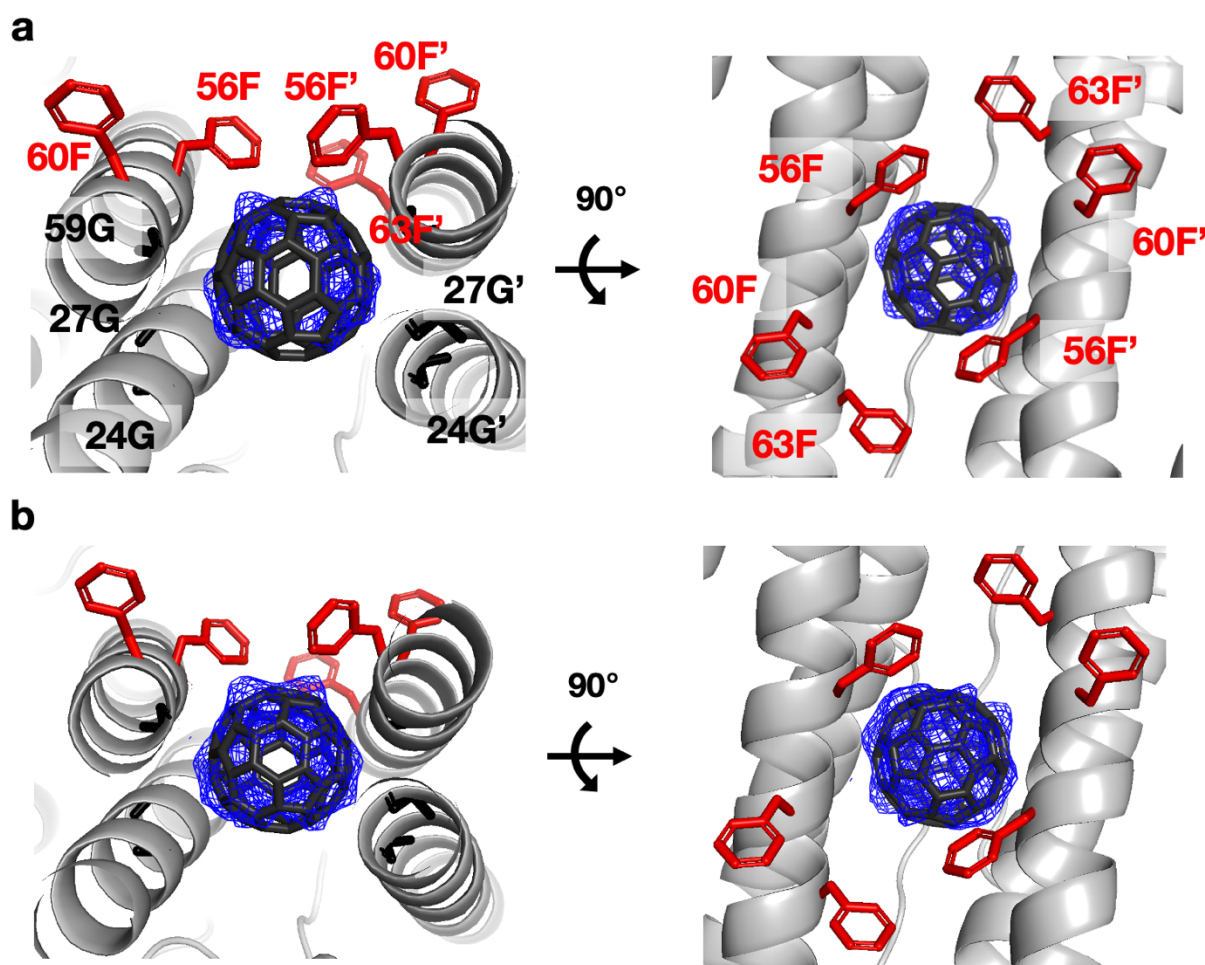

Fig. S6.  $2F_o - F_c$  map of C<sub>60</sub> in the crystal structure of C<sub>60</sub>·Fr-F3G3, contoured at (a) 0.8  $\sigma$  and (b) 0.5  $\sigma$ .

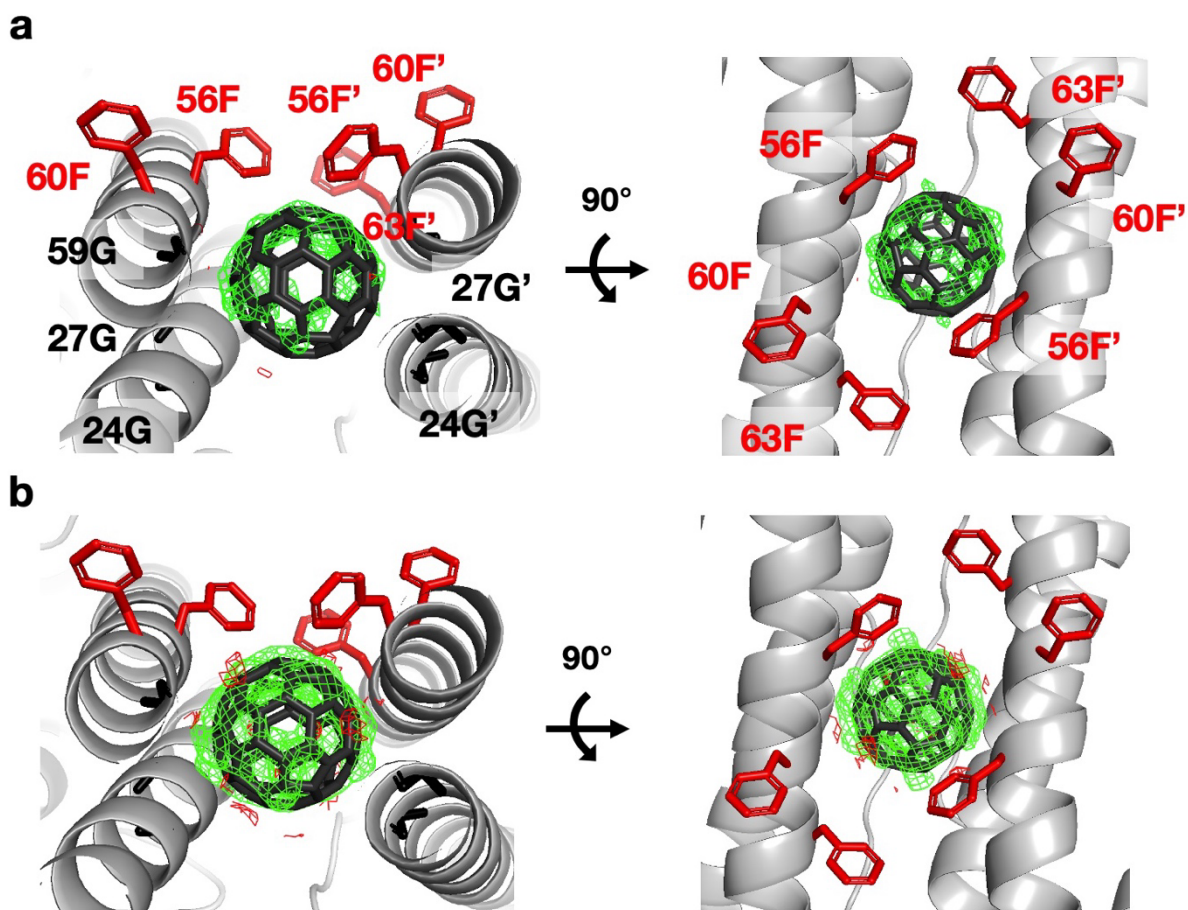

**Fig. S7.** Difference Fourier map  $F_o(C_{60}\cdot\text{Fr-F3G3}) - F_o(\text{apo-Fr-F3G3})$ , contoured at (a)  $3.0 \sigma$  and (b)  $2.0 \sigma$ .

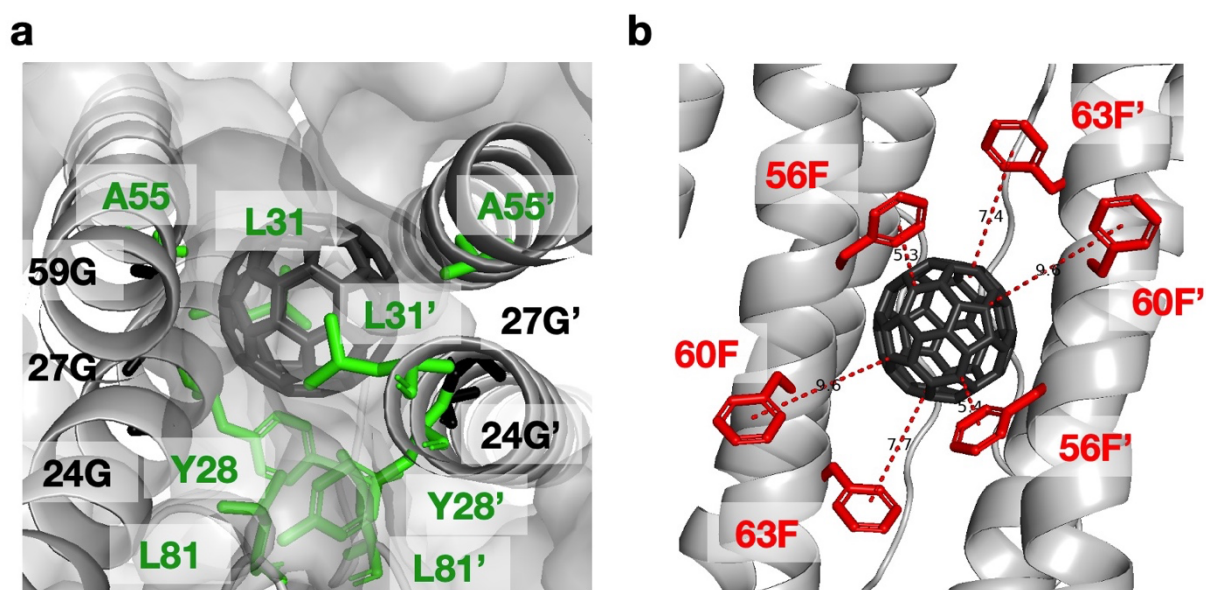

**Fig. S8.** Surrounding environment of  $C_{60}$  in the crystal structure of  $C_{60}\cdot\text{Fr-F3G3}$ . (a) Residues constituting the hydrophobic cavity. Distance information is summarized in Table S2. (b) Distances between aromatic rings of Phe and  $C_{60}$ . The unit of the given distances is Å.

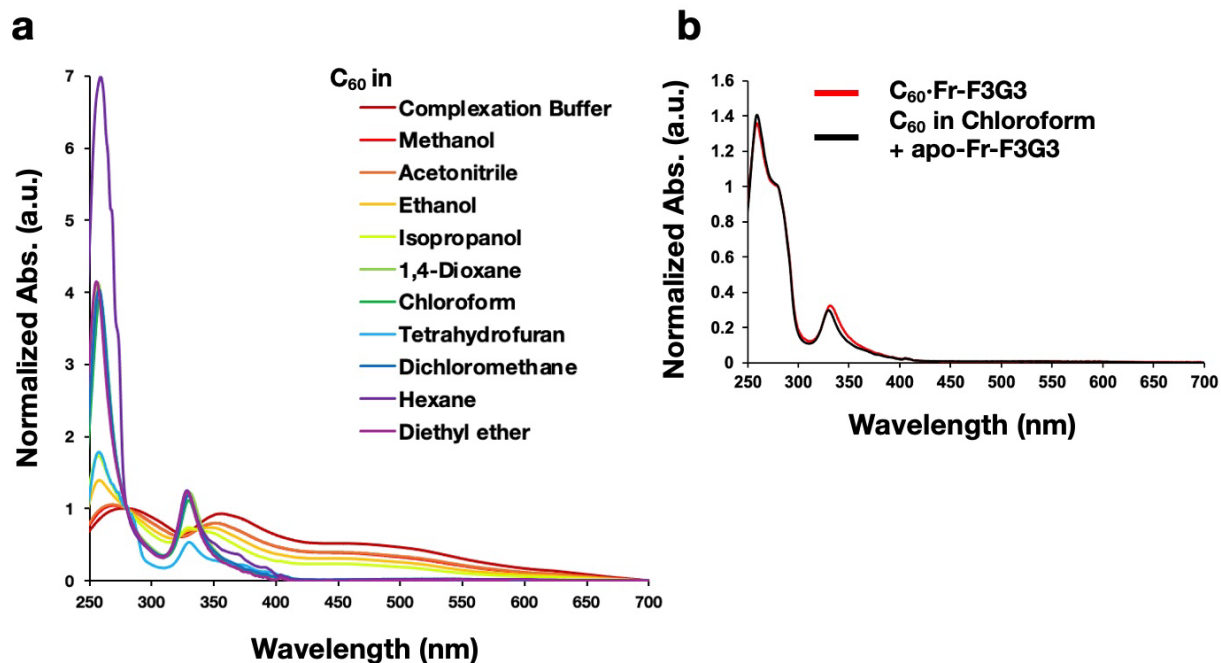

**Fig. S9.** (a) UV-vis spectra of  $C_{60}$  in various solvents. Complexation buffer is mixture of 50% methanol, 5% PEG400, and 45% buffer (50 mM Tris-HCl, 150 mM NaCl, pH 8.0). All spectra are normalized by  $Abs_{280}$ . As the solvent becomes more hydrophobic, the peak tends to blue-shift and the shoulder peak around 450 nm resulting from the aggregation of  $C_{60}$  tends to disappear. Information of peak existence and wavelength are summarized in Table S3. (b) Alignment of UV-vis spectra of  $C_{60} \cdot Fr-F3G3$  and mixed spectrum of  $C_{60}$  in Chloroform and apo-Fr-F3G3 in a ratio of 0.25:0.75, which means that  $C_{60}$  in  $Fr-F3G3$  resides in a hydrophobic environment comparable to chloroform.

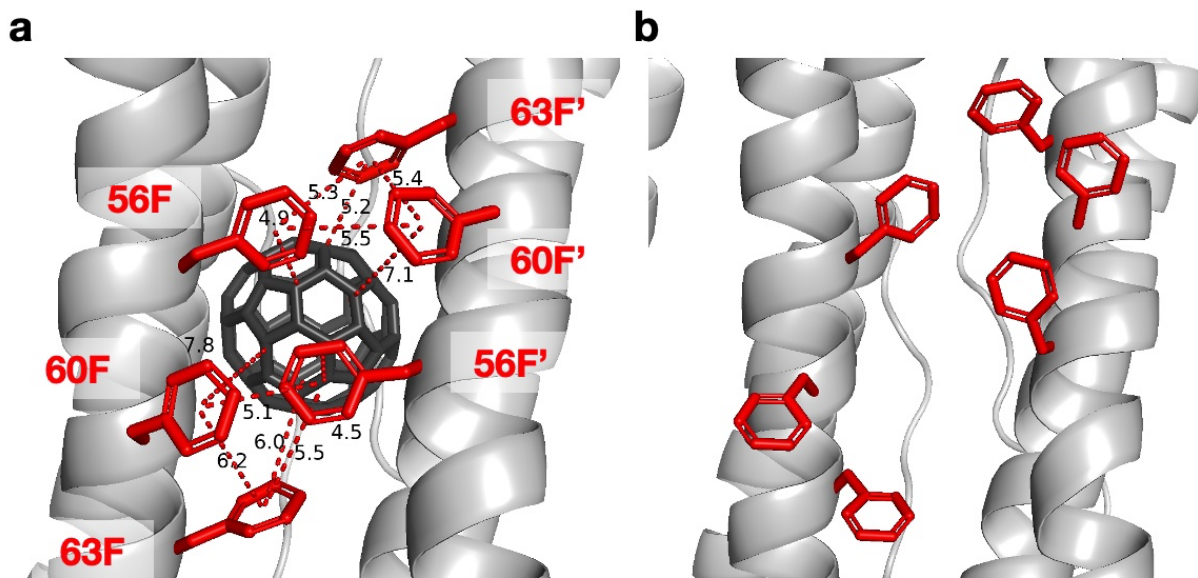

**Fig. S10.** Representative snapshots in MD simulation of (a)  $C_{60}\cdot Fr-F3G3$  at 77 ns, with Phe residues adopting inward conformations and covering  $C_{60}$  (b)  $apo-Fr-F3G3$  at 7.4 ns, with most Phe residues adopting outward conformations.

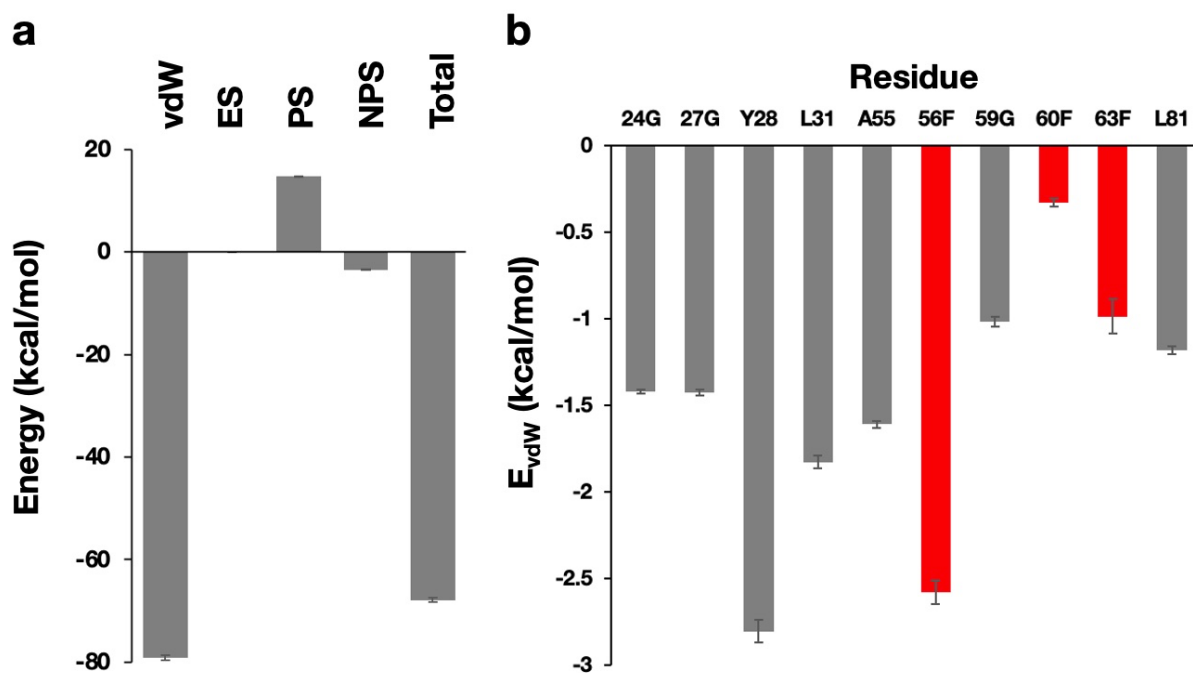

**Fig. S11.** Energy decomposition analysis based on MM/GBSA calculations using MD trajectories of  $C_{60}\cdot Fr-F3G3$ . (a) Binding energy between  $C_{60}$  and the Fr dimer decomposed into van der Waals (vdW), electrostatic (ES), polar solvation (PS), and non-polar solvation (NPS) energies. (b) Van der Waals interaction energies between  $C_{60}$  and each residue constituting the hydrophobic cavity or the Phe gate.

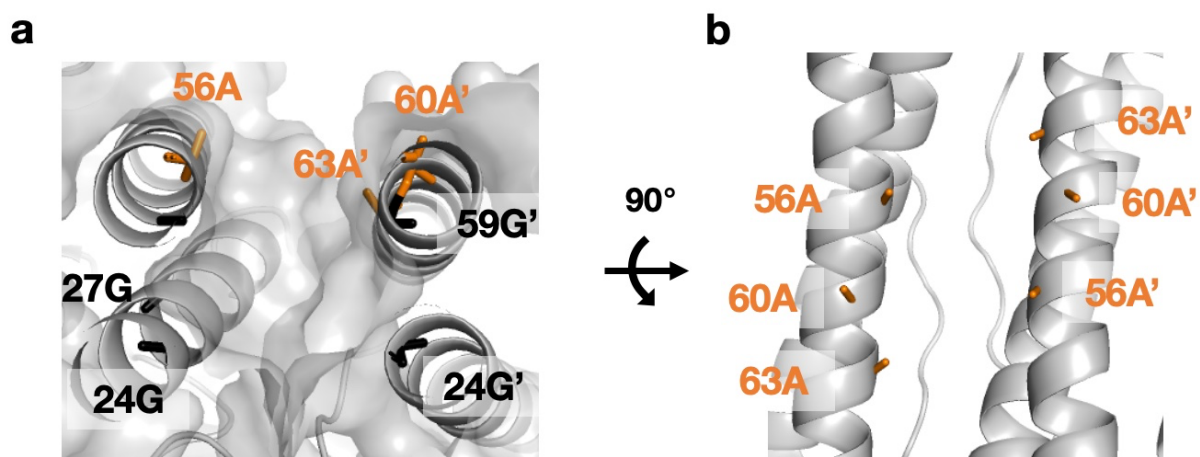

Fig. S12. Crystal structures showing the  $C_{60}$  immobilization site in apo-Fr-A3G3: (a) side view with surface (b) top view.

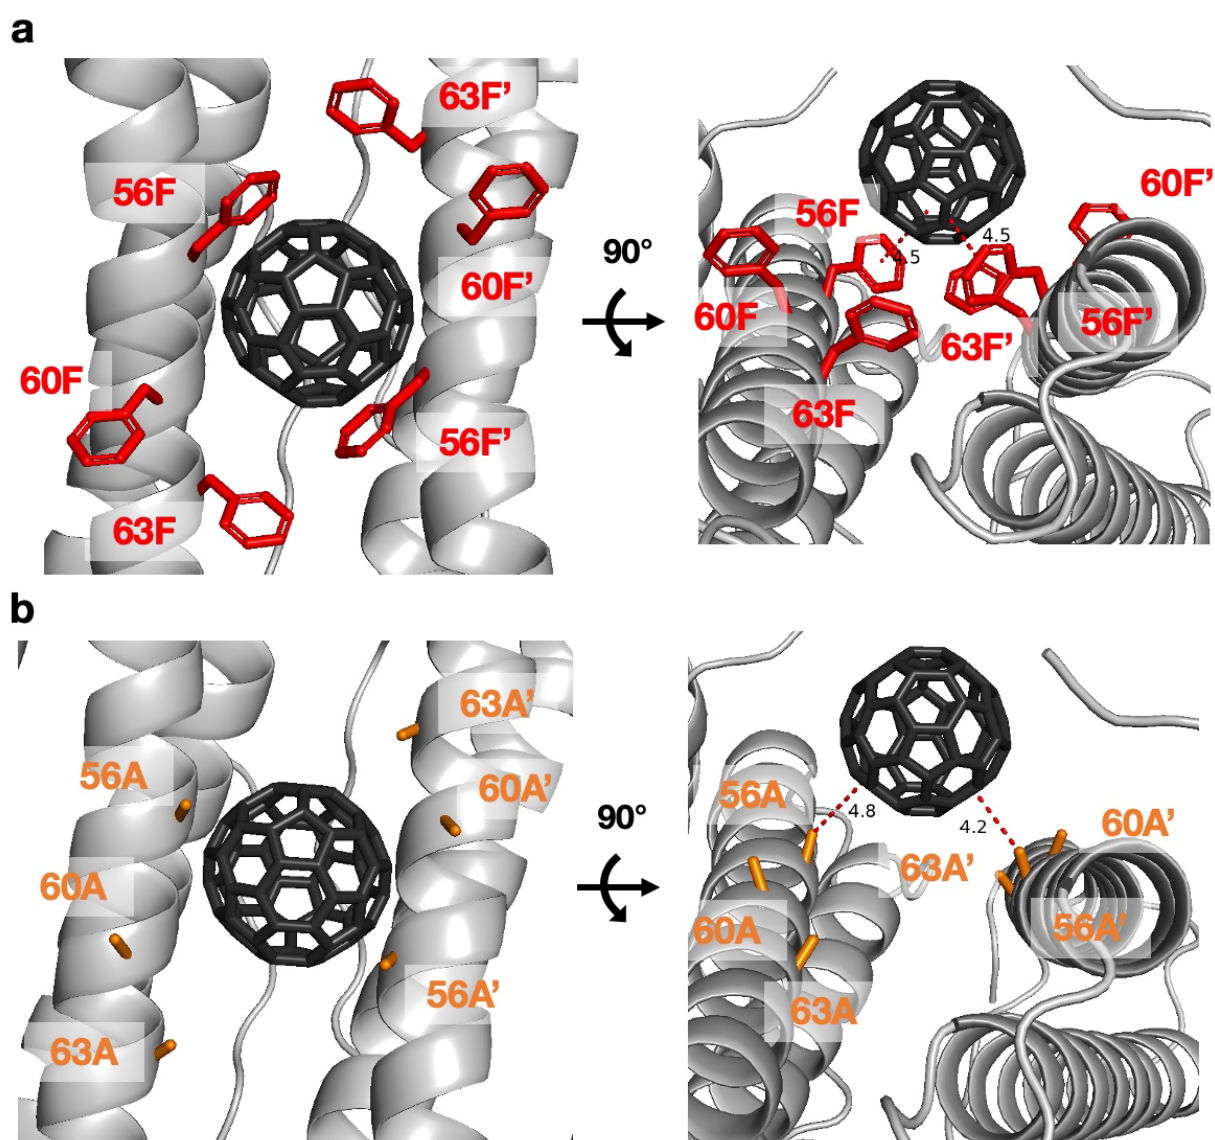

Fig. S13. Initial structure of (a) apo-Fr-F3G3 +  $C_{60}$  and (b) apo-Fr-A3G3 +  $C_{60}$  for MD simulations.

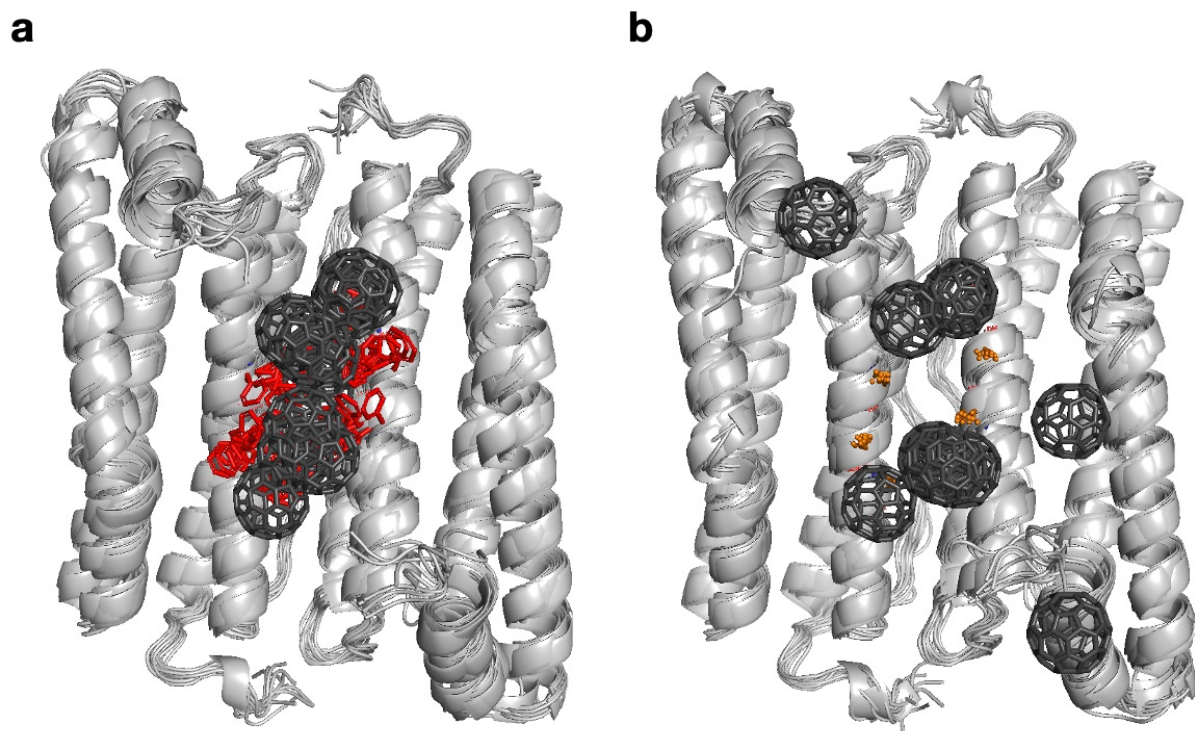

**Fig. S14.** Positions of C<sub>60</sub> after 100 ns of MD simulations of in-silico generated structure that C<sub>60</sub> molecules were placed in cage but outer immobilization sites of (a) **apo-Fr-F3G3** (b) **apo-Fr-A3G3**. Coordinates of all 12 dimers and corresponding C<sub>60</sub> molecules are aligned.

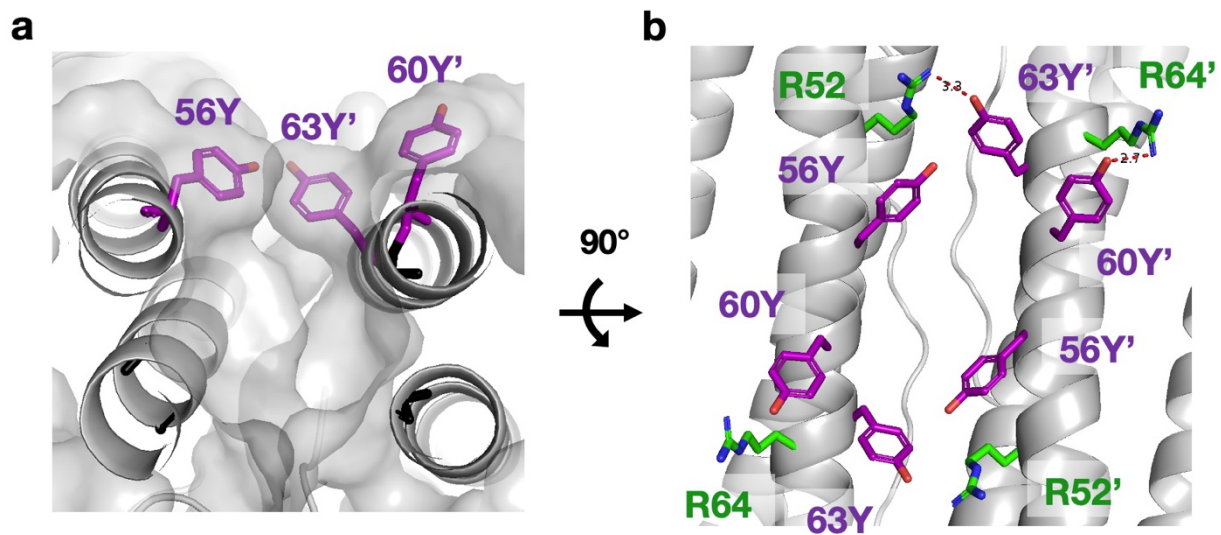

**Fig. S15.** Crystal structures showing the C<sub>60</sub> binding site in **apo-Fr-Y3G3** (a) side view with surface (b) top view with distances between Tyr and nearby Arg residues.

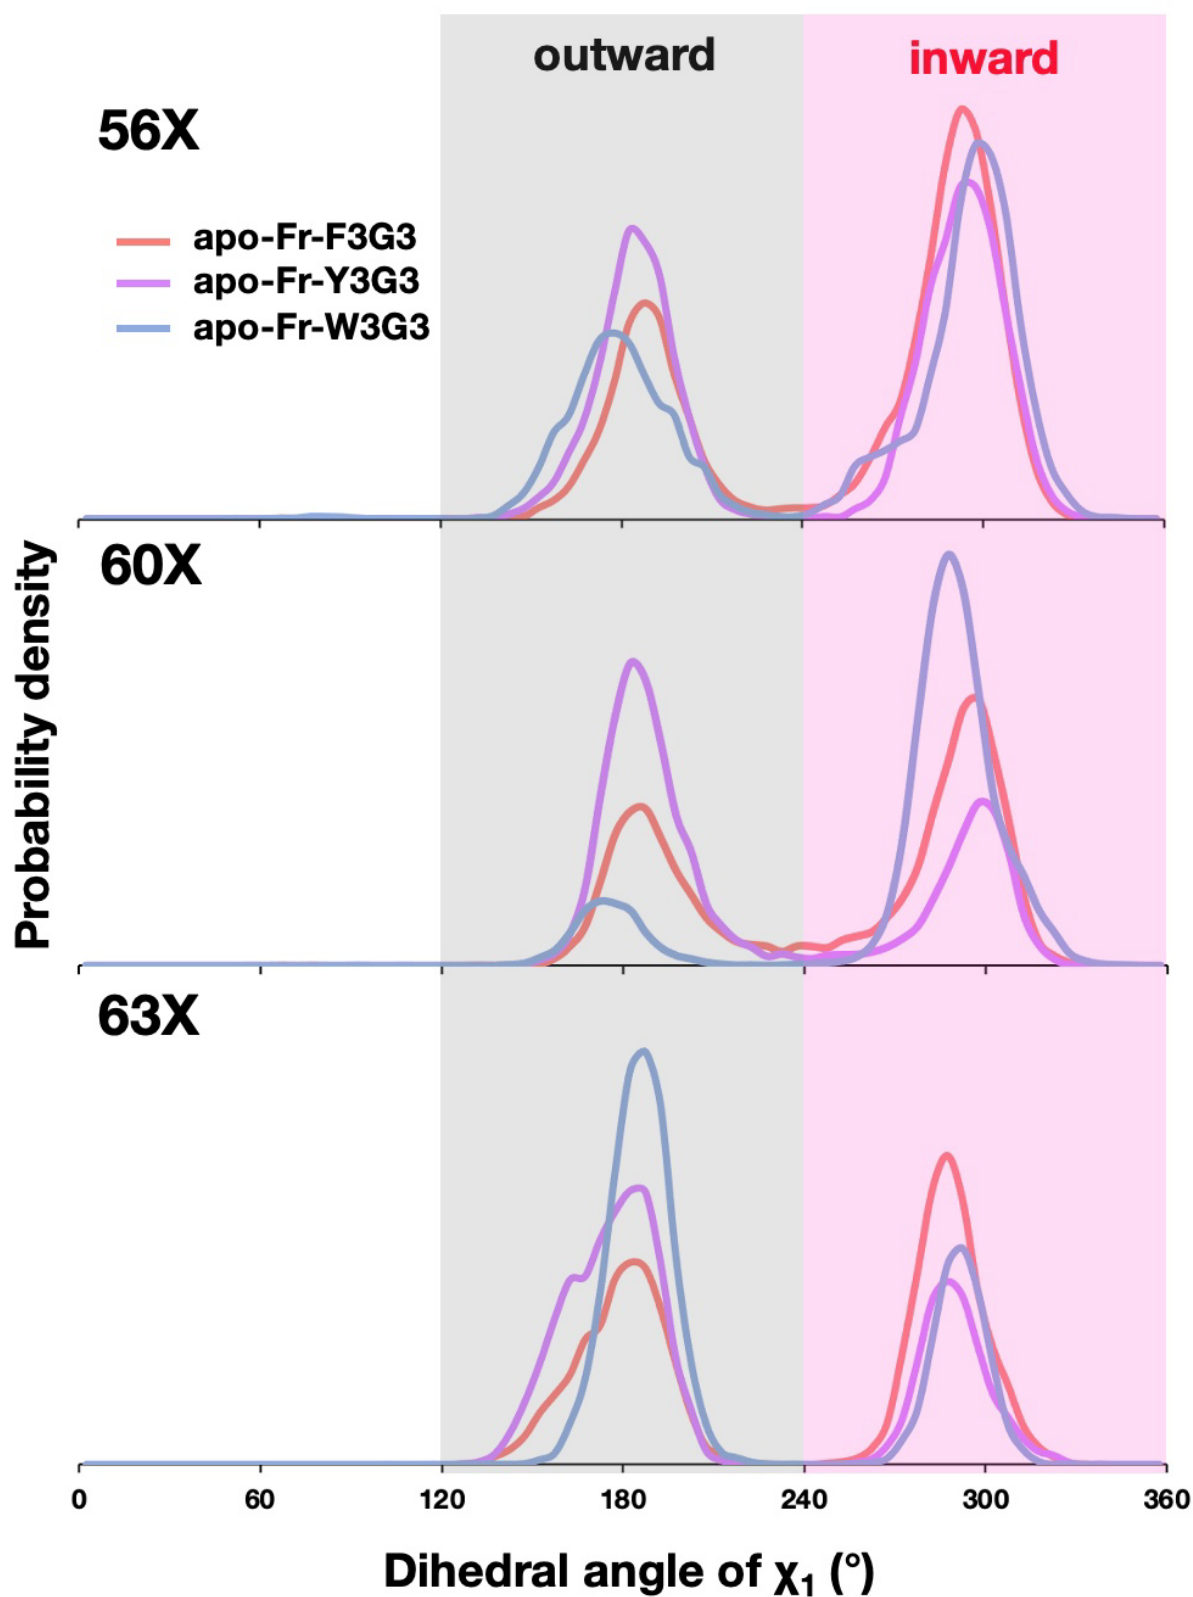

**Fig. S16.** Distributions of  $\chi_1$  (N-C $\alpha$ -C $\beta$ -C $\gamma$ ) dihedral angles of aromatic residues during MD simulations of apo-Fr-X3G3 (X = F, Y, W).

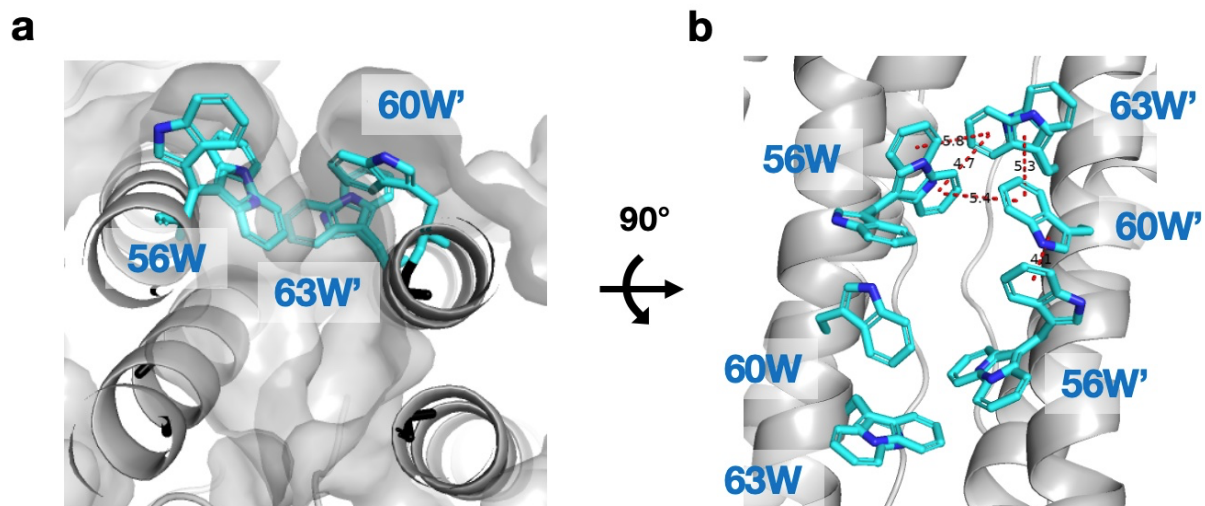

**Fig. S17.** Crystal structures showing the C<sub>60</sub> binding site in **apo-Fr-W3G3**. 56W and 63W have multiple conformations. (a) side view with surface (b) Distances between aromatic rings of Trp residues.

### 3. Supplementary tables

**Table S1.** Summary of X-ray data and refinement statistics

|                                         | <b>C<sub>60</sub>·Fr-<br/>F3G3</b> | <b>apo-Fr-<br/>F3G3</b> | <b>apo-Fr-<br/>Y3G3</b> | <b>apo-Fr-<br/>W3G3</b> | <b>apo-Fr-<br/>A3G3</b> |
|-----------------------------------------|------------------------------------|-------------------------|-------------------------|-------------------------|-------------------------|
| PDB ID                                  | 21LO                               | 21LP                    | 21LQ                    | 21LR                    | 21LS                    |
| <b>Data collection</b>                  |                                    |                         |                         |                         |                         |
| X-ray wavelength (Å)                    | 1.54                               | 1.54                    | 1.54                    | 1.54                    | 1.54                    |
| Space group                             | <i>F</i> 432                       | <i>F</i> 432            | <i>F</i> 432            | <i>F</i> 432            | <i>F</i> 432            |
| Cell dimensions                         |                                    |                         |                         |                         |                         |
| $a = b = c$ (Å)                         | 180.22                             | 181.15                  | 180.88                  | 181.14                  | 181.57                  |
| $\alpha = \beta = \gamma$ (°)           | 90                                 | 90                      | 90                      | 90                      | 90                      |
| Resolution range (Å)                    | 24.08–1.99                         | 22.13–1.57              | 22.10–1.76              | 22.13–1.50              | 22.70–1.57              |
| [a]                                     | (2.04–<br>1.99)                    | (1.60–<br>1.57)         | (1.80–<br>1.76)         | (1.53–<br>1.50)         | (1.60–<br>1.57)         |
| Completeness (%) [a]                    | 99.9<br>(100.0)                    | 100.0<br>(100.0)        | 99.9<br>(100.0)         | 100.0<br>(100.0)        | 100.0<br>(100.0)        |
| Multiplicity [a]                        | 12.9 (9.4)                         | 10.6 (7.4)              | 11.4 (8.4)              | 11.8 (7.8)              | 10.7 (7.4)              |
| Unique reflections [a]                  | 17758<br>(1270)                    | 36031<br>(1742)         | 25653<br>(1422)         | 41188<br>(2012)         | 36283<br>(1766)         |
| $R_{\text{merge}}$ [a]                  | 0.101<br>(0.868)                   | 0.065<br>(0.742)        | 0.080<br>(0.822)        | 0.039<br>(0.342)        | 0.054<br>(0.832)        |
| $R_{\text{means}}$ [a]                  | 0.109<br>(0.973)                   | 0.072<br>(0.859)        | 0.086<br>(0.928)        | 0.043<br>(0.394)        | 0.060<br>(0.968)        |
| $I/\sigma$ (I) [a]                      | 22.2 (2.6)                         | 23.4 (2.3)              | 16.7 (2.0)              | 36.5 (5.1)              | 25.7 (2.0)              |
| CC(1/2) [a]                             | 0.998<br>(0.821)                   | 0.999<br>(0.831)        | 0.999<br>(0.912)        | 1.000<br>(0.954)        | 1.000<br>(0.862)        |
| <b>Refinement</b>                       |                                    |                         |                         |                         |                         |
| Resolution (Å)                          | 1.99                               | 1.57                    | 1.76                    | 1.50                    | 1.57                    |
| Reflections used                        | 17753                              | 35709                   | 24556                   | 40973                   | 35212                   |
| $R_{\text{work}} / R_{\text{free}}$ [b] | 0.179 /<br>0.221                   | 0.194 /<br>0.213        | 0.217 /<br>0.242        | 0.189 /<br>0.207        | 0.203 /<br>0.222        |
| r. m. s. deviations                     |                                    |                         |                         |                         |                         |
| Bond lengths (Å)                        | 0.008                              | 0.008                   | 0.008                   | 0.007                   | 0.006                   |
| Bond angles (°)                         | 0.995                              | 0.994                   | 1.011                   | 0.946                   | 0.849                   |
| Ramachandran plot [c]                   |                                    |                         |                         |                         |                         |
| Favored                                 | 168                                | 167                     | 167                     | 168                     | 167                     |
| Allowed                                 | 3                                  | 3                       | 3                       | 3                       | 2                       |
| Outlier                                 | 0                                  | 0                       | 0                       | 0                       | 0                       |

[a] Values in parentheses are for the highest resolution shell.

[b]  $R_{\text{work}} = \sum ||F_o| - |F_c|| / \sum |F_o|$ , where  $F_o$  and  $F_c$  are the observed and calculated structure factor amplitudes, respectively.  $R_{\text{free}}$  is an  $R$  factor calculated on a partial set that is not used in the refinement of the structure.

[c] Ramachandran plot parameters were calculated using *RAMPAGE*.

**Table S2.** Distances between C<sub>60</sub> and carbon atoms of residues constituting the hydrophobic cavity in the crystal structure of C<sub>60</sub>·Fr-F3G3.

| Residue | Distance (Å) |
|---------|--------------|
| 24G     | 3.9          |
| 27G     | 3.6          |
| Y28     | 3.9          |
| L31     | 3.5          |
| A55     | 4.0          |
| 59G     | 3.1          |
| L81     | 3.3          |

**Table S3.** List of the peaks in the UV–vis spectra of C<sub>60</sub> in various solvents.

| C <sub>60</sub> in  | 1st peak (nm) | 2nd peak (nm) | Existence of shoulder peak around 450 nm | Total difference of peak wavelength (nm) |
|---------------------|---------------|---------------|------------------------------------------|------------------------------------------|
| <b>Fr-F3G3</b>      | <b>259</b>    | <b>332</b>    | ×                                        | <b>0</b>                                 |
| Complexation Buffer | 278           | 357           | ○                                        | 44                                       |
| Methanol            | 269           | 352           | ○                                        | 30                                       |
| Acetonitrile        | 269           | 351           | ○                                        | 29                                       |
| Ethanol             | 258           | 347           | ○                                        | 16                                       |
| Isopropanol         | 257           | 330           | ○                                        | 4                                        |
| 1,4-Dioxane         | 257           | 331           | ×                                        | 3                                        |
| <b>Chloroform</b>   | <b>259</b>    | <b>330</b>    | ×                                        | <b>2</b>                                 |
| Tetrahydrofuran     | 258           | 330           | ×                                        | 3                                        |
| Dichloromethane     | 258           | 330           | ×                                        | 3                                        |
| Hexane              | 259           | 329           | ×                                        | 3                                        |
| Diethyl ether       | 256           | 329           | ×                                        | 6                                        |

**Table S4.** Contributions of each residue to the van der Waals interaction energy between C<sub>60</sub> and Fr-F3G3 calculated by MM/GBSA.

| Residue              | Contribution (%) |
|----------------------|------------------|
| 24G                  | 7.2              |
| 27G                  | 7.2              |
| Y28                  | 14.2             |
| L31                  | 9.2              |
| A55                  | 8.1              |
| <b>56F</b>           | <b>13.1</b>      |
| 59G                  | 5.1              |
| <b>60F</b>           | <b>1.7</b>       |
| <b>63F</b>           | <b>5.0</b>       |
| L81                  | 6.0              |
| Total (Cavity)       | 57.1             |
| <b>Total (Phe)</b>   | <b>19.7</b>      |
| Total (Cavity + Phe) | 76.8             |

## 4. Description of supplementary Movies

**Movie S1.** MD simulation of **C<sub>60</sub>·Fr-F3G3**

**Movie S2.** MD simulation of **apo-Fr-F3G3**

**Movie S3.** MD simulation of in-silico generated structure of **C<sub>60</sub>·Fr-A3G3**

**Movie S4.** MD simulation of **apo-Fr-F3G3 + C<sub>60</sub>**

**Movie S5.** MD simulation of **apo-Fr-A3G3 + C<sub>60</sub>**

**Movie S6.** MD simulation of **apo-Fr-Y3G3**

**Movie S7.** MD simulation of **apo-Fr-W3G3**

## 5. Supplementary references

- 1 [A. Ikeda, M. Mori, K. Kiguchi, K. Yasuhara, J. Kikuchi, K. Nobusawa, M. Akiyama, M. Hashizume, T. Ogawa and T. Takeya, \*Chemistry – An Asian Journal\*, 2012, \*\*7\*\*, 605–613.](#)
- 2 [J. A. Maier, C. Martinez, K. Kasavajhala, L. Wickstrom, K. E. Hauser and C. Simmerling, \*J. Chem. Theory Comput.\*, 2015, \*\*11\*\*, 3696–3713.](#)
- 3 [D. R. Roe and T. E. I. Cheatham, \*J. Chem. Theory Comput.\*, 2013, \*\*9\*\*, 3084–3095.](#)
- 4 [B. R. I. Miller, T. D. Jr. McGee, J. M. Swails, N. Homeyer, H. Gohlke and A. E. Roitberg, \*J. Chem. Theory Comput.\*, 2012, \*\*8\*\*, 3314–3321.](#)
